# Supplementary figures and images for: The Reparative Function of MMP13 in Tertiary Reactionary Dentinogenesis after Tooth Injury
Source: MDPI journal article supplement (doi:10.3390/ijms25020875), 2024-01-10

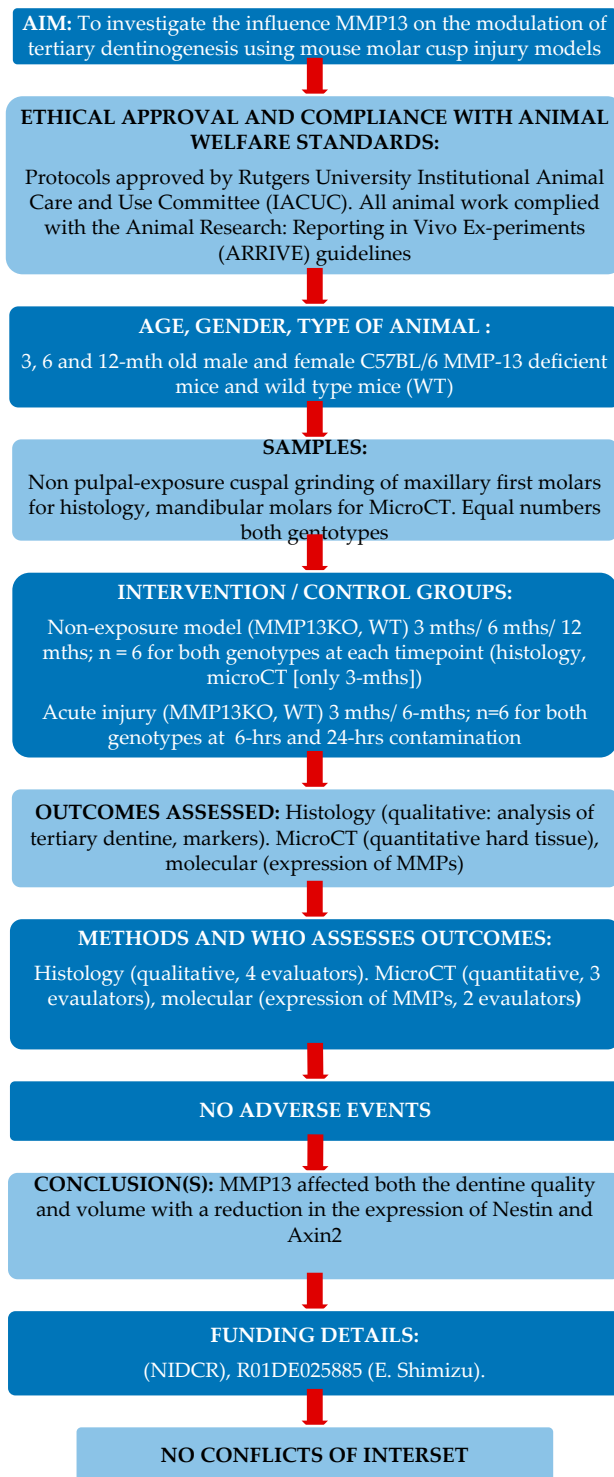

**Supplementary Figure S1:** Experimental flowchart

Supplement: s1 [file s1]
